# Supplementary material for: Evolution of ASC Immunophenotypical Subsets During Expansion In Vitro
Source: MDPI journal article supplement (doi:10.3390/ijms21041408), 2020-02-19
Supplement: s1 [file s1]

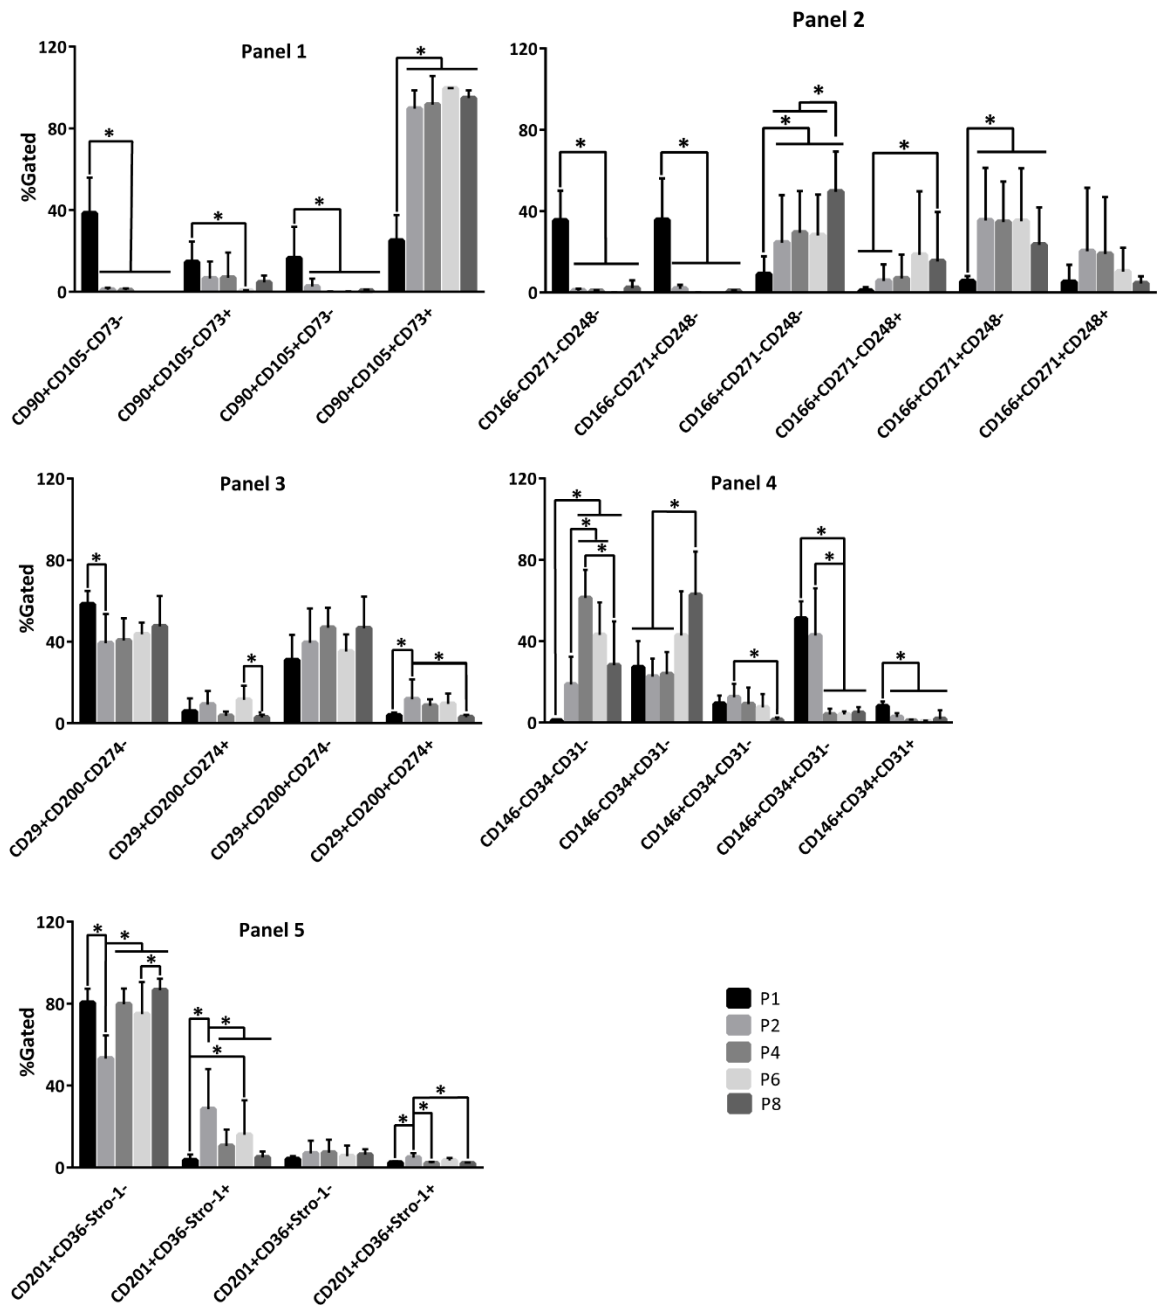

**Figure S1.** Proportion of adipose-derived stem cells belonging to different subpopulations within each panel of markers. Bars denote mean + standard deviation from 3 independent donors. \*  $p < 0.05$ , P, passage.

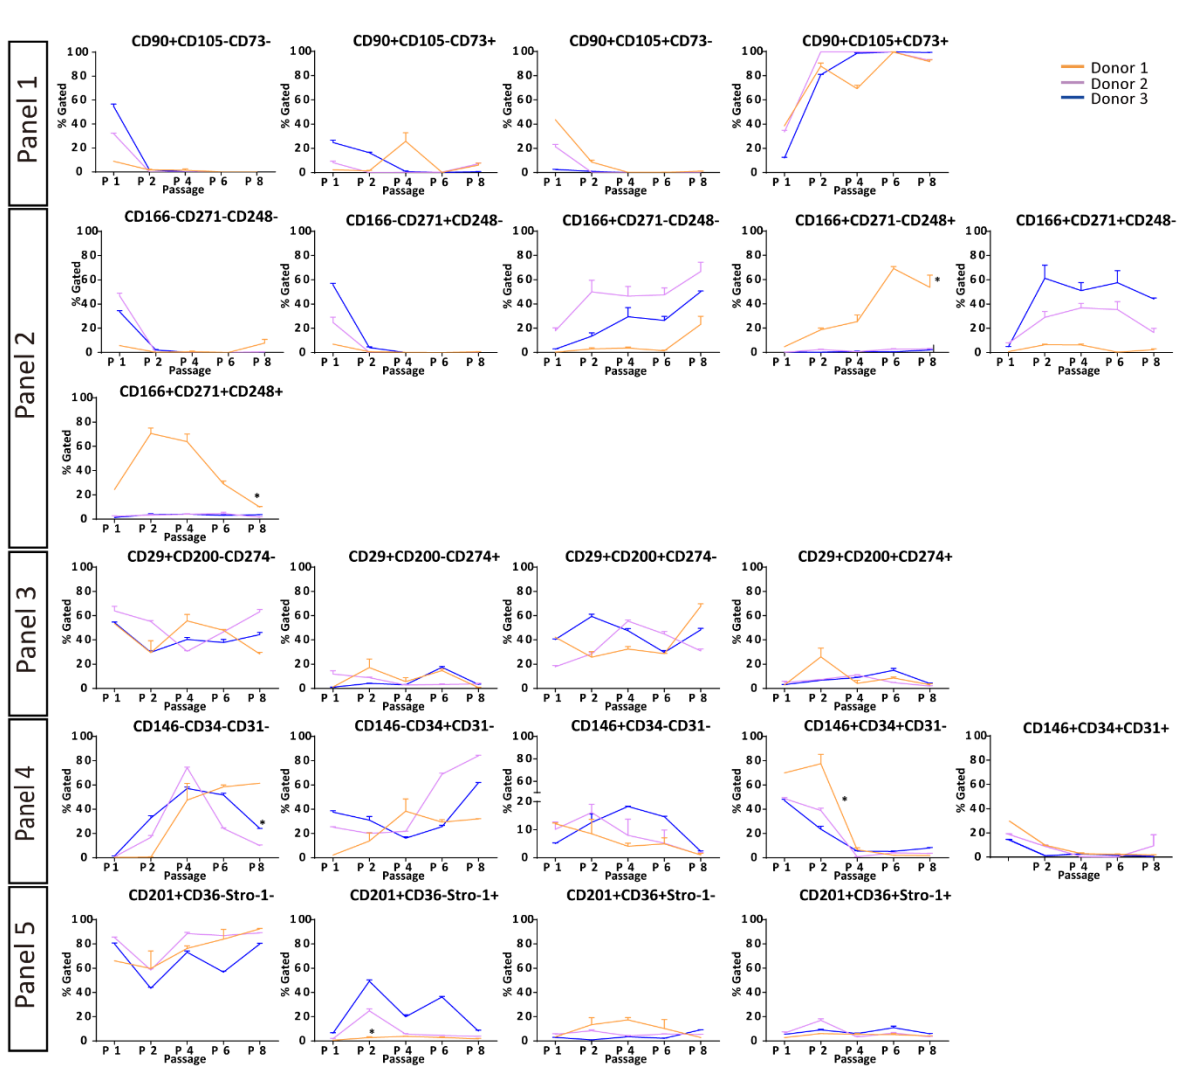

**Figure S2.** Interdonor variations of dynamic changes to surface marker profiles. Data is presented as average from repeated measurements of each donor ( $n = 2-3$ ). \* denotes statistically significant differences between donor 1 and both donor 2 and 3.  $p < 0.05$ . P, passage.
